# Supplementary material for: Effect of Irrigation and Fertilizer Management on Rice Yield and Nitrogen Loss: A Meta-Analysis
Source: MDPI journal article supplement (doi:10.3390/plants11131690), 2022-06-26
Supplement: s1 [file s1]

**Table S1.** The effect of irrigation schedules on yield (P=0.00000)

| W  | study | E      | CI <sub>lower</sub> | CI <sub>upper</sub> | Z       | ZC1     | ZC2     | E <sub>min</sub> | E <sub>max</sub> | SD    |
|----|-------|--------|---------------------|---------------------|---------|---------|---------|------------------|------------------|-------|
| W2 | 39    | 0.007  | -0.015              | 0.029               | 0.692   | -1.528  | 2.973   | -0.132           | 0.329            | 0.023 |
| W1 | 89    | 0.025  | 0.013               | 0.038               | 2.573   | 1.298   | 3.863   | -0.207           | 0.456            | 0.051 |
| W9 | 14    | 0.025  | -0.010              | 0.060               | 2.491   | -1.035  | 6.141   | -0.069           | 0.092            | 0.034 |
| W4 | 8     | -0.239 | -0.312              | -0.166              | -21.251 | -26.765 | -15.321 | -0.367           | 0.004            | 0.067 |
| W7 | 3     | 0.043  | -0.191              | 0.278               | 4.415   | -17.420 | 32.022  | 0.033            | 0.056            | 0.000 |
| W5 | 9     | -0.080 | -0.220              | 0.061               | -7.670  | -19.756 | 6.237   | -0.170           | -0.016           | 0.000 |

**Table S2.** The effect of nitrogen application on yield (P=0.00011).

| N  | study | E      | CI <sub>lower</sub> | CI <sub>upper</sub> | Z      | ZC1    | ZC2    | E <sub>min</sub> | E <sub>max</sub> | SD    |
|----|-------|--------|---------------------|---------------------|--------|--------|--------|------------------|------------------|-------|
| N5 | 29    | 0.4516 | 0.396               | 0.508               | 57.082 | 48.542 | 66.113 | 0.170            | 0.741            | 0.077 |
| N2 | 23    | 0.1958 | 0.132               | 0.260               | 21.628 | 14.065 | 29.693 | 0.067            | 0.449            | 0.047 |
| N3 | 47    | 0.2621 | 0.221               | 0.303               | 29.966 | 24.732 | 35.419 | 0.104            | 0.615            | 0.099 |
| N4 | 46    | 0.3632 | 0.321               | 0.406               | 43.792 | 37.823 | 50.020 | 0.006            | 0.700            | 0.198 |
| N8 | 9     | 0.3855 | 0.278               | 0.493               | 47.035 | 31.996 | 63.788 | 0.190            | 0.491            | 0.093 |
| N7 | 4     | 0.2975 | -0.079              | 0.674               | 34.649 | -7.550 | 96.109 | 0.203            | 0.413            | 0.000 |
| N6 | 3     | 0.2974 | -0.090              | 0.685               | 34.635 | -8.625 | 98.377 | 0.259            | 0.324            | 0.000 |

**Table S3.** The effect of water-nitrogen coupling on yield (P=0.00987).

| combination | study | E     | CI <sub>lower</sub> | CI <sub>upper</sub> | Z      | ZC1     | ZC2          | E <sub>min</sub> | E <sub>max</sub> | SD    |
|-------------|-------|-------|---------------------|---------------------|--------|---------|--------------|------------------|------------------|-------|
| WIN5        | 4     | 0.437 | 0.224               | 0.650               | 54.806 | 25.145  | 91.497       | 0.217            | 0.601            | 0.087 |
| WIN3        | 16    | 0.246 | 0.178               | 0.315               | 27.941 | 19.518  | 36.957       | 0.131            | 0.429            | 0.078 |
| WIN4        | 19    | 0.393 | 0.330               | 0.456               | 48.083 | 39.055  | 57.696       | 0.071            | 0.621            | 0.175 |
| W2N2        | 3     | 0.164 | -0.158              | 0.486               | 17.857 | -14.606 | 62.645       | 0.124            | 0.228            | 0.023 |
| W2N3        | 5     | 0.318 | 0.155               | 0.481               | 37.396 | 16.719  | 61.737       | 0.187            | 0.565            | 0.062 |
| W3N2        | 2     | 0.141 | -0.980              | 1.263               | 15.177 | -62.469 | 253.46<br>0  | 0.160            | 0.385            | 0.068 |
| W3N4        | 2     | 0.219 | -0.903              | 1.340               | 24.458 | -59.461 | 282.05<br>7  | -0.001           | 0.346            | 0.112 |
| WIN2        | 4     | 0.241 | 0.036               | 0.446               | 27.265 | 3.645   | 56.268       | 0.217            | 0.601            | 0.087 |
| W4N4        | 5     | 0.109 | -0.073              | 0.292               | 11.561 | -7.068  | 33.924       | 0.131            | 0.429            | 0.078 |
| W5N2        | 2     | 0.045 | -1.980              | 2.071               | 4.645  | -86.199 | 693.43<br>4  | 0.071            | 0.621            | 0.175 |
| W5N4        | 2     | 0.208 | -2.008              | 2.424               | 23.109 | -86.580 | 1029.3<br>19 | 0.124            | 0.228            | 0.023 |
| W5N5        | 2     | 0.262 | -1.841              | 2.366               | 29.992 | -84.139 | 965.36<br>2  | 0.187            | 0.565            | 0.062 |
| W5N7        | 2     | 0.199 | -1.868              | 2.267               | 22.055 | -84.557 | 864.55<br>8  | 0.160            | 0.385            | 0.068 |

**Table S4.** The effect of irrigation schedules on nitrogen use efficiency (P= 0.01682).

| W  | study | E      | CI <sub>lower</sub> | CI <sub>upper</sub> | E <sub>min</sub> | E <sub>max</sub> | SD    |
|----|-------|--------|---------------------|---------------------|------------------|------------------|-------|
| W1 | 27    | 0.474  | 0.078               | 0.870               | -2.400           | 6.586            | 0.747 |
| W2 | 13    | 1.064  | 0.466               | 1.663               | 0.404            | 2.545            | 0.000 |
| W4 | 4     | -1.637 | -3.322              | 0.048               | -3.020           | -1.164           | 0.000 |

**Table S5.** The effect of nitrogen application on nitrogen use efficiency (P=0.03588).

| N  | study | E      | Clower | Clupper | Emin   | Emax    | SD    |
|----|-------|--------|--------|---------|--------|---------|-------|
| N4 | 51    | 11.923 | 10.467 | 13.380  | 2.715  | 240.982 | 4.208 |
| N5 | 18    | 13.494 | 10.727 | 16.260  | 9.229  | 239.474 | 3.437 |
| N2 | 6     | 8.776  | 4.220  | 13.333  | 5.325  | 12.298  | 1.268 |
| N3 | 22    | 11.758 | 9.523  | 13.993  | 6.311  | 49.898  | 2.333 |
| N6 | 4     | 12.257 | 4.298  | 20.216  | 11.300 | 14.624  | 0.000 |
| N9 | 4     | 15.353 | 6.235  | 24.471  | 11.303 | 18.583  | 0.000 |

**Table S6.** The effect of water-nitrogen coupling on nitrogen use efficiency (P=0.01631).

| combination | study | E      | Clower | Clupper | Emin   | Emax    | SD    |
|-------------|-------|--------|--------|---------|--------|---------|-------|
| W1N5        | 3     | 16.259 | 0.978  | 31.541  | 11.314 | 22.858  | 4.473 |
| W1N4        | 13    | 9.595  | 6.607  | 12.584  | 2.715  | 240.982 | 4.614 |
| W2N4        | 7     | 15.750 | 10.105 | 21.394  | 11.306 | 37.924  | 3.422 |
| W4N4        | 4     | 11.312 | 3.483  | 19.140  | 11.300 | 11.326  | 0.000 |
| W1N3        | 8     | 13.135 | 8.566  | 17.704  | 11.314 | 32.527  | 1.368 |
| W2N9        | 4     | 15.383 | 6.093  | 24.673  | 11.303 | 18.583  | 0.000 |

**Table S7.** The effect of irrigation schedules on NO<sub>2</sub> (P=0.00004).

| W  | study | E     | Clower | Clupper | Z      | ZC1     | ZC2    | Emin   | Emax  | SD    |
|----|-------|-------|--------|---------|--------|---------|--------|--------|-------|-------|
| W1 | 35    | 0.517 | 0.426  | 0.609   | 67.766 | 53.066  | 83.878 | 0.000  | 1.658 | 0.299 |
| W2 | 20    | 0.060 | -0.065 | 0.184   | 6.162  | -6.246  | 20.214 | -0.590 | 0.445 | 0.214 |
| W9 | 6     | 0.357 | 0.085  | 0.629   | 42.846 | 8.828   | 87.480 | 0.235  | 0.521 | 0.066 |
| W6 | 5     | 0.121 | -0.213 | 0.454   | 12.806 | -19.168 | 57.444 | 0.098  | 0.140 | 0.000 |

**Table S8.** The effect of nitrogen application on NO<sub>2</sub> (P=0.00538).

| N  | study | E     | Clower | Clupper | Z      | ZC1    | ZC2     | Emin   | Emax  | SD    |
|----|-------|-------|--------|---------|--------|--------|---------|--------|-------|-------|
| N4 | 17    | 0.657 | 0.514  | 0.800   | 92.861 | 67.197 | 122.443 | 0.162  | 1.671 | 0.297 |
| N2 | 15    | 0.366 | 0.212  | 0.519   | 44.123 | 23.627 | 68.035  | 0.060  | 0.661 | 0.187 |
| N3 | 31    | 0.581 | 0.478  | 0.683   | 78.711 | 61.317 | 97.961  | -0.329 | 1.484 | 0.281 |

**Table S9.** The effect of water-nitrogen coupling on NO<sub>2</sub> (P=0.00000).

| combination | study | E     | Clower | Clupper | Z       | ZC1     | ZC2     | Emin  | Emax  | SD    |
|-------------|-------|-------|--------|---------|---------|---------|---------|-------|-------|-------|
| W2N2        | 5     | 0.566 | 0.330  | 0.802   | 76.033  | 39.041  | 122.888 | 0.486 | 0.731 | 0.059 |
| W2N3        | 9     | 0.824 | 0.677  | 0.970   | 127.892 | 96.856  | 163.821 | 0.661 | 1.219 | 0.144 |
| W1N4        | 7     | 0.919 | 0.743  | 1.095   | 150.703 | 110.223 | 199.008 | 0.301 | 1.990 | 0.135 |
| W1N3        | 7     | 1.069 | 0.891  | 1.246   | 191.188 | 143.830 | 247.710 | 0.364 | 1.851 | 0.296 |
| W1N2        | 3     | 0.677 | 0.214  | 1.140   | 96.856  | 23.899  | 212.771 | 0.094 | 0.966 | 0.399 |

**Table S10.** The effect of irrigation schedules on nitrogen runoff (P=0.00138).

| W  | study | E      | Clower | Clupper | Z       | ZC1     | ZC2     | Emin   | Emax   | SD    |
|----|-------|--------|--------|---------|---------|---------|---------|--------|--------|-------|
| W2 | 6     | -0.215 | -0.595 | 0.166   | -19.306 | -44.855 | 18.081  | -0.326 | -0.057 | 0.000 |
| W1 | 21    | -0.397 | -0.544 | -0.250  | -32.787 | -41.969 | -22.151 | -0.994 | 0.125  | 0.366 |
| W5 | 3     | -1.085 | -1.887 | -0.283  | -66.213 | -84.846 | -24.678 | -1.107 | -1.050 | 0.000 |
| W7 | 3     | 0.420  | -0.382 | 1.221   | 52.135  | -31.757 | 239.159 | 0.394  | 0.445  | 0.000 |

**Table S11.** The effect of nitrogen application on nitrogen runoff (P=0.52096).

| N  | study | E     | Clower | Clupper | Z       | ZC1     | ZC2      | Emin   | Emax  | SD    |
|----|-------|-------|--------|---------|---------|---------|----------|--------|-------|-------|
| N4 | 15    | 0.696 | 0.347  | 1.045   | 100.511 | 41.453  | 184.226  | 0.121  | 1.850 | 0.524 |
| N7 | 5     | 0.818 | -0.030 | 1.666   | 126.551 | -2.955  | 428.832  | 0.617  | 1.314 | 0.122 |
| N3 | 10    | 0.960 | 0.524  | 1.397   | 161.274 | 68.911  | 304.184  | 0.068  | 1.856 | 0.706 |
| N5 | 14    | 1.372 | 1.020  | 1.723   | 294.165 | 177.319 | 460.299  | 0.337  | 2.271 | 0.730 |
| N2 | 3     | 0.958 | -0.557 | 2.472   | 160.544 | -42.725 | 1085.085 | 0.761  | 1.078 | 0.151 |
| N6 | 5     | 0.760 | -0.085 | 1.604   | 113.785 | -8.140  | 397.487  | -0.273 | 1.792 | 0.516 |

**Table S12.** The effect of water-nitrogen coupling on nitrogen runoff (P=0.53041).

| combination | study | E     | Clower | Clupper | Z       | ZC1     | ZC2        | Emin  | Emax  | SD    |
|-------------|-------|-------|--------|---------|---------|---------|------------|-------|-------|-------|
| WIN3        | 2.000 | 1.599 | -4.670 | 7.868   | 394.957 | -99.062 | 261185.821 | 0.121 | 1.850 | 0.524 |
| WIN5        | 3.000 | 1.340 | -0.394 | 3.073   | 281.752 | -32.544 | 2060.663   | 0.617 | 1.314 | 0.122 |

**Table S13.** The effect of irrigation schedules on nitrogen leaching (P=0.00000).

| W  | study | E      | Clower | Clupper | Z       | ZC1     | ZC2     | Emin   | Emax   | SD    |
|----|-------|--------|--------|---------|---------|---------|---------|--------|--------|-------|
| W1 | 15    | -0.154 | -0.258 | -0.049  | -14.239 | -22.748 | -4.791  | -0.550 | 0.126  | 0.280 |
| W2 | 24    | -0.676 | -0.752 | -0.599  | -49.125 | -52.867 | -45.086 | -1.140 | -0.185 | 0.169 |
| W7 | 3     | -0.319 | -0.791 | 0.153   | -27.327 | -54.670 | 16.498  | -0.386 | -0.258 | 0.000 |
| W8 | 5     | -0.432 | -0.668 | -0.196  | -35.053 | -48.701 | -17.774 | -0.527 | -0.388 | 0.000 |

**Table S14.** The effect of nitrogen application on nitrogen leaching (P=0.44466).

| N  | study | E     | Clower | Clupper | Z       | ZC1     | ZC2     | Emin   | Emax  | SD    |
|----|-------|-------|--------|---------|---------|---------|---------|--------|-------|-------|
| N3 | 9     | 0.351 | -0.008 | 0.710   | 42.077  | -0.757  | 103.379 | 0.012  | 0.823 | 0.214 |
| N4 | 9     | 0.731 | 0.372  | 1.089   | 107.633 | 45.063  | 197.190 | 0.222  | 1.216 | 0.297 |
| N5 | 15    | 0.677 | 0.422  | 0.932   | 96.796  | 52.501  | 153.958 | -0.272 | 1.337 | 0.506 |
| N7 | 3     | 0.519 | -0.612 | 1.650   | 67.984  | -45.779 | 420.490 | 0.019  | 1.420 | 0.648 |

**Table S15.** The effect of water-nitrogen coupling on nitrogen leaching (P=0.24925).

| combination | study | E     | Clower | Clupper | Z       | ZC1     | ZC2        | Emin  | Emax  | SD    |
|-------------|-------|-------|--------|---------|---------|---------|------------|-------|-------|-------|
| WIN3        | 2     | 0.067 | -8.969 | 9.102   | 6.908   | -99.987 | 897222.121 | 0.000 | 0.134 | 0.047 |
| WIN5        | 3     | 1.487 | -1.011 | 3.985   | 342.380 | -63.618 | 5279.605   | 0.406 | 2.825 | 1.227 |

**Table S16.** The effect of irrigation schedules on nitrogen NH<sub>3</sub> (P=0.02987).

| W  | study | E      | Clower | Clupper | Z       | ZC1     | ZC2     | Emin   | Emax  | SD    |
|----|-------|--------|--------|---------|---------|---------|---------|--------|-------|-------|
| W1 | 13    | -0.004 | -0.097 | 0.088   | -0.439  | -9.244  | 9.210   | -0.257 | 0.323 | 0.187 |
| W2 | 17    | -0.235 | -0.312 | -0.159  | -20.975 | -26.831 | -14.658 | -0.474 | 0.159 | 0.084 |

**Table S17.** The effect of nitrogen application on nitrogen NH<sub>3</sub> (P=0.00000).

| N   | study | E     | Clower | Clupper | Z        | ZC1      | ZC2      | Emin  | Emax  | SD    |
|-----|-------|-------|--------|---------|----------|----------|----------|-------|-------|-------|
| N4  | 27    | 1.785 | 1.518  | 2.051   | 495.660  | 356.355  | 677.567  | 0.791 | 3.419 | 0.676 |
| N3. | 17    | 2.305 | 1.957  | 2.654   | 902.719  | 607.665  | 1320.935 | 1.038 | 3.526 | 0.749 |
| N5  | 21    | 2.839 | 2.531  | 3.146   | 1609.011 | 1156.355 | 2224.756 | 1.421 | 4.509 | 0.624 |
| N6  | 9     | 2.677 | 2.150  | 3.205   | 1354.577 | 758.228  | 2365.303 | 1.927 | 3.762 | 0.557 |
| N7  | 10    | 3.350 | 2.872  | 3.828   | 2748.849 | 1666.526 | 4494.753 | 1.999 | 5.202 | 0.636 |

**Table S18.** The effect of water-nitrogen coupling on nitrogen NH<sub>3</sub> (P= 0.09947).

| <b>combination</b> | <b>study</b> | <b>E</b> | <b>Clower</b> | <b>Clupper</b> | <b>Z</b> | <b>ZC1</b> | <b>ZC2</b>   | 0.815 | 3.372 | 1.386 |
|--------------------|--------------|----------|---------------|----------------|----------|------------|--------------|-------|-------|-------|
| WIN3               | 3            | 2.406    | -0.045        | 4.857          | 1009.062 | -4.391     | 12765.057    | 1.056 | 1.236 | 0.098 |
| WIN4               | 2            | 1.146    | -7.719        | 10.010         | 214.464  | -99.956    | 2225573.637  | 3.584 | 3.800 | 0.130 |
| WIN5               | 2            | 3.692    | -5.173        | 12.557         | 3912.100 | -99.433    | 28396221.951 | 0.815 | 3.372 | 1.386 |
